# Supplementary material for: Genetic spectrum and genotype–phenotype correlations in DNAH5-mutated primary ciliary dyskinesia: a systematic review
Source: Springer Nature journal article supplement (doi:10.1186/s13023-025-03596-5), 2025-03-03

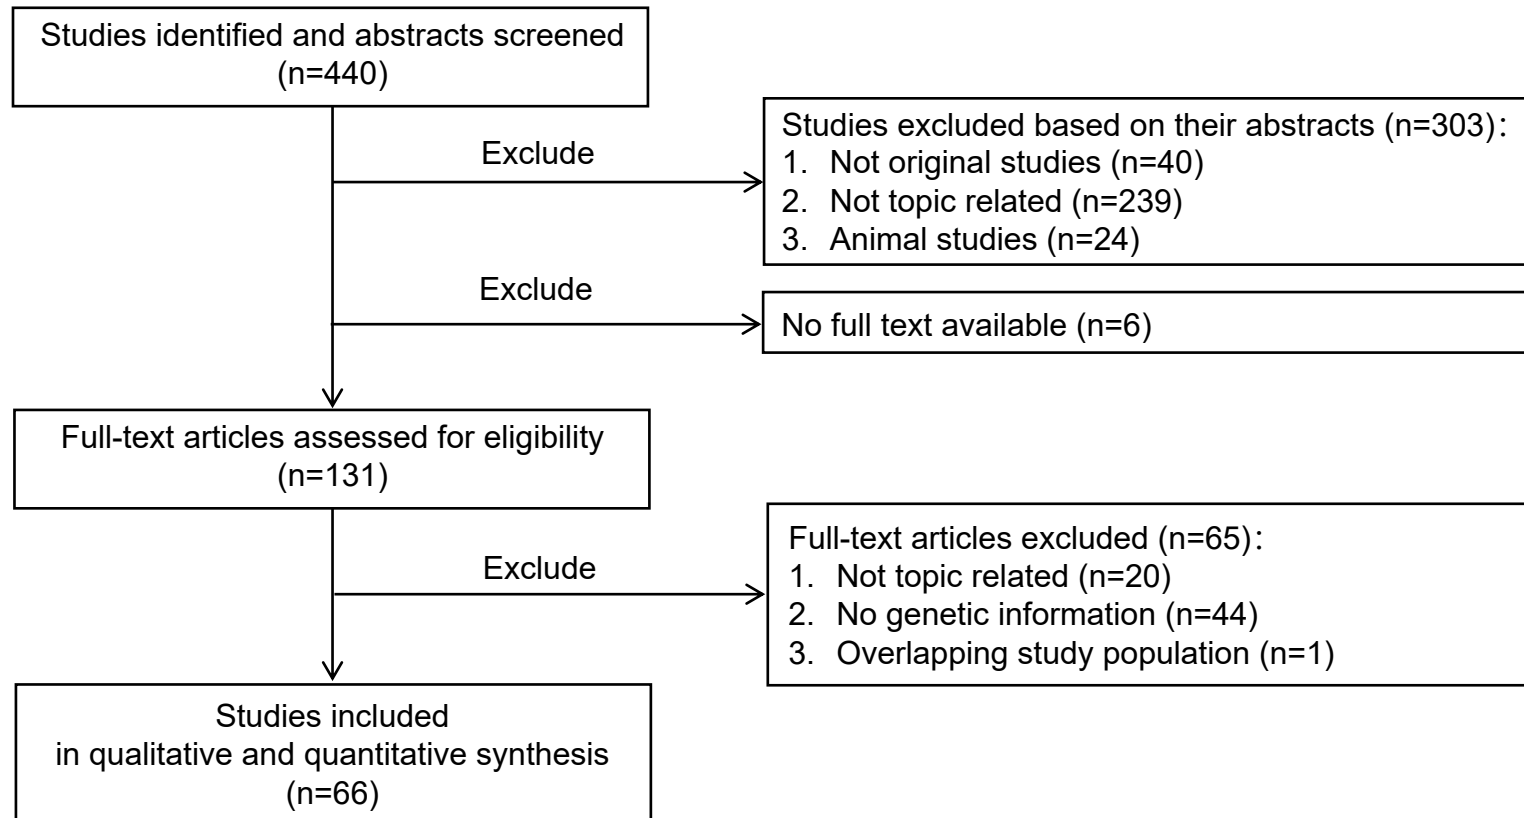

Supplement: MOESM2 [file 13023_2025_3596_MOESM2_ESM.pdf]
